# Supplementary material for: Transcriptomic Analysis of Cadmium Stress Response in the Heavy Metal Hyperaccumulator Sedum alfredii Hance
Source: PLoS One. 2013 Jun 3;8(6):e64643. doi: 10.1371/journal.pone.0064643 (PMC3670878; doi:10.1371/journal.pone.0064643)
Supplement: Figure S4 — Partial protein sequence alignment of CAM-type PEPCs. Accession numbers are listed in Table S5. Identical amino acids are marked with stars (*) under the lines, colons and dots indicate different amino acids with strong and weak similarity, respectively. (PDF) [file pone.0064643.s004.pdf]

|                  |                                                               |     |
|------------------|---------------------------------------------------------------|-----|
| CvPEPC2_CAM_type | FHGRGGTVGRGGGPSHLAAILSQPPDTIHGLLRVTVQGEVIEQSFGEHLCFRTLQRFTAA  | 60  |
| CsPEPC2_CAM_type | FHGRGGTVGRGGGPSHLAAILSQPPDTIHGLLRVTVQGEVIEQSFGEHLCFRTLQRFTAA  | 60  |
| CrPEPC2_CAM_type | FHGRGGTVGRGGGPSHLAAILSQPPDTIHGSLRVTVQGEVIEQSFGEHLCFRTLQRFTAA  | 60  |
| ChPEPC2_CAM_type | FHGRGGTVGRGGGPSHLAAILSQPPDTIRGSLRVTVQGEVIEQSFGEHLCFRTLQRFTAA  | 60  |
| CsPEPC3_CAM_type | FHGRGGTVGRGGGPSHLAAILSQPPDTIHGSLRVTVQGEVIEQSFGEHLCFRTLQRFTAA  | 60  |
| CaPEPC_CAM_type  | FHGRGGTVGRGGGPSHLAAILSQPPDTIHGSLRVTVQGEVIEQSFGEHLCFRTLQRFTAA  | 60  |
| McPEPC1_CAM_type | FHGRGGTVGRGGGPTHLAAILAQPAETIGGSLRVTIQGEVIEQSFGEQHLCFRTLQRYTAA | 60  |
| KbPEPC1_CAM_type | FHGRGGTVGRGGGPTHLAAILSQPADTIQGSLRVTIQGEVIERSFGEAQLCFKTLQRYTAA | 60  |
| KbPEPC2_CAM_type | FHGRGGTVGRGGGPTHLAAILSQPADTIQGSLRVTIQGEVIERSFGEAQLCFKTLQRYTAA | 60  |
| Sa_Contig08207   | FHGRGGTVGRGGGPTHLAAILSQPPDTVQGSLRVTVQGEVIERSFGESQLCFRTLQRFTAA | 60  |
|                  | *****:*****:*. *: * ****:*****:***** :***:*****:***           |     |
|                  |                                                               |     |
| CvPEPC2_CAM_type | TLEHGMHPPVSPKPEWRA-LLDEMAVIATEEYRSIVFKEPQFVEYFRLATPELEYGRMNI  | 119 |
| CsPEPC2_CAM_type | TLEHGMHPPVSPKPEWRA-LLDEMAVIATEEYRSIVFKEPQFVEYFRLATPELEYGRMNI  | 119 |
| CrPEPC2_CAM_type | TLEHGMHPPVSPKPEWRA-LLDEMAVIATEEYRSIVFKEPKFVEYFRLATPELEYGRMNI  | 119 |
| ChPEPC2_CAM_type | TLEHGMHPPVSPKPEWRA-LLDEMAVIATEEYRSIVFKEPQFVEYFRLATPELEYGRMNI  | 119 |
| CsPEPC3_CAM_type | TLEHGMHPPVSPKPEWRA-LLDEMAVVATEEYRSIVFKEPQFVEYFRLATPELEYGRMNI  | 119 |
| CaPEPC_CAM_type  | TLEHGMHPPVSPKPEWRA-LLDEMAVVATEEYRSIVFKEPQFVEYFRLATPELEYGRMNI  | 119 |
| McPEPC1_CAM_type | TLEHGMNPPKSPKPEWRA-LLDQMAVVATEEYRSIVFKEPRFVEYFRLATPELEYGRMNI  | 119 |
| KbPEPC1_CAM_type | TLEHGMIPPSSPKQECRACLMDMAVVTTYRYSIVFREPRFVEYFRLATPELEYGRMNI    | 120 |
| KbPEPC2_CAM_type | TLEHGMIPPSSPKQEWRACLMDMAVVTTYRYSIVFREPRFVEYFRLATPELEYGRMNI    | 120 |
| Sa_Contig08207   | TLEHGMNPLAPKQEWRD-LMDMAVVATEHYRSIVFEEPRFVEYFRLATPEMEYGRMNI    | 119 |
|                  | ***** ** :** * * *:*:***:*. *****. **:***** *****             |     |
|                  |                                                               |     |
| CvPEPC2_CAM_type | GSRPSKRKPSGGIESLRAIPWIFAWTQTRFHLPVWLGFGAAFKHI IKKDIRNLVYLQEMY | 179 |
| CsPEPC2_CAM_type | GSRPSKRKPSGGIESLRAIPWIFAWTQTRFHLPVWLGFGAAFKHI IKKDIRNLHVLQEMY | 179 |
| CrPEPC2_CAM_type | GSRPSKRKPSGGIESLRAIPWIFAWTQTRFHLPVWLGFGAAFKHI IKKDIRNLHVLQEMY | 179 |
| ChPEPC2_CAM_type | GSRPSKRKPSGGIESLRAIPWIFAWTQTRFHLPVWLGFGAAFKHI IKKDIRNLHVLQEMH | 179 |
| CsPEPC3_CAM_type | GSRPSKRKPSGGIESLRAIPWIFAWTQTRFHLPVWLGFGAAFKHI IKKDIRNLHVLQEMY | 179 |
| CaPEPC_CAM_type  | GSRPSKRKPSGGIESLRAIPWIFAWTQTRFHLPVWLGFGAAFKHI IKKDIRNLHVLQEMY | 179 |
| McPEPC1_CAM_type | GSRPSKRKPSGGIESLRAIPWIFAWTQTRFHLPVWLGVGGALKHVLEKDIRNHNMLRDMY  | 179 |
| KbPEPC1_CAM_type | GSRPSKRKPSGGIESLRAIPWIFAWTQTRFHLPVWLGFGEAFRHVIDKDNKNLLMLQQMY  | 180 |
| KbPEPC2_CAM_type | GSRPSKRKPSGGIESLRAIPWIFAWTQTRFHLPVWLGFGEAFRHVIDKDNKNLLMLQQMY  | 180 |
| Sa_Contig08207   | GSRPSKRKPSGGIESLRAIPWIFAWTQTRFHLPVWLGFGEAFRHIIDKDNKNLLMLQQMY  | 179 |
|                  | *****:*****:*****. * *:*:.. ** :* :*:*:                       |     |
|                  |                                                               |     |
| CvPEPC2_CAM_type | NAWPFFRVTIDMLEMVFAKGNPGIAALYDKLLVSEDLWTFGEKLRTNYEETKKLLQIAG   | 239 |
| CsPEPC2_CAM_type | NAWPFFRVTIDMLEMVFAKGDPGIAALYDKLLVSEDLWTFGEELRTNYEETKKLLQIAG   | 239 |
| CrPEPC2_CAM_type | NAWPFFRVTIDMLEMVFAKGDPGIAALYDKLLVSEELWTFGEKLRTNYEETKKLLQIAG   | 239 |
| ChPEPC2_CAM_type | NAWPFFRVTIDLLEMVFAKGDPGIAALYDKLLVSEDLWTFGEKLRTNYEETKTFLQIAG   | 239 |
| CsPEPC3_CAM_type | NAWPFFRVTIDMLEMVFAKGNPEIAALYDKLLVSEDLWTFGEKLRTNYEETKKLLQIAG   | 239 |
| CaPEPC_CAM_type  | NAWPFFRVTIDMLEMVFAKGNPEIAALYDKLLVSEDLWTFGEKLRTNYEETKRLLQIAG   | 239 |
| McPEPC1_CAM_type | NNPFFRVTIDLLEMVFAKGDPEIAALYDKLLVSEELQSFGERLRANYEDTKRRLLEVAG   | 239 |
| KbPEPC1_CAM_type | NEWPFFRVTIDLVMVFAKGDPGIAALYDKLLS-EELWPLGEQLRTAYNDTKSYLLKITG   | 239 |
| KbPEPC2_CAM_type | NEWPFFRATIDLVMVFAKGDPGIAALYDKLLS-EELWPLGEQLRTAYNDTKSYLLKITG   | 239 |
| Sa_Contig08207   | NEWPFFRVTIDLVMVFAKGNPGIAALYDKLLVSEDLLALGERLRTAYNDTQGFLKITG    | 239 |
|                  | * :****. ***:*****:***** ***** *: * :*. ** :*:*: *****:***:*  |     |

**Figure S4 Partial protein sequence alignment of CAM-type PEPCs. Accession numbers are listed in Table S5. Identical amino acids are marked with stars (\*) under the lines, colons and dots indicate different amino acids with strong and weak similarity, respectively.**
