# Supplementary material for: Transcriptomic Analysis of Cadmium Stress Response in the Heavy Metal Hyperaccumulator Sedum alfredii Hance
Source: PubMed Central journal article supplement (PMC3670878; doi:10.1371/journal.pone.0064643), 2013-06-03
Supplement: pone.0064643.s001.pdf [file pone.0064643.s001.pdf]

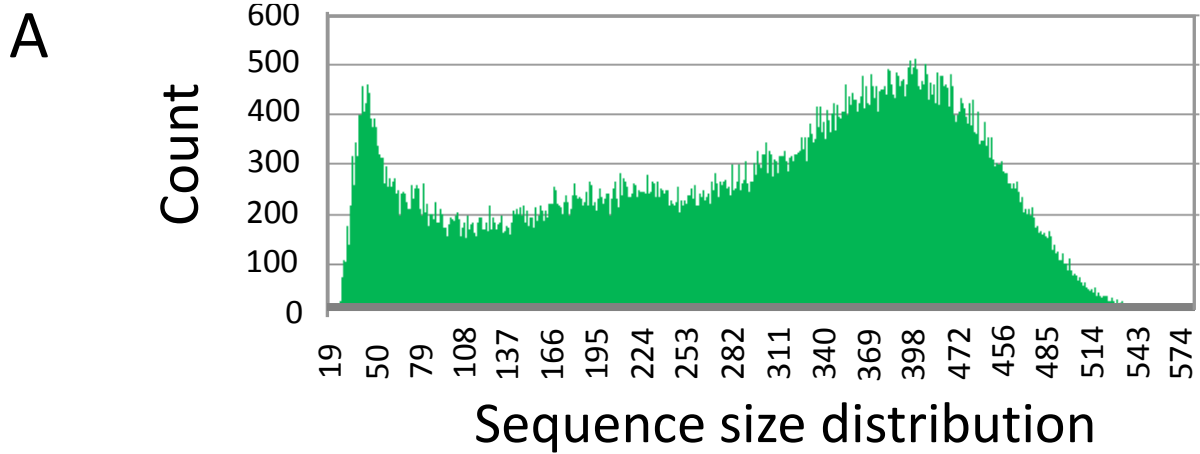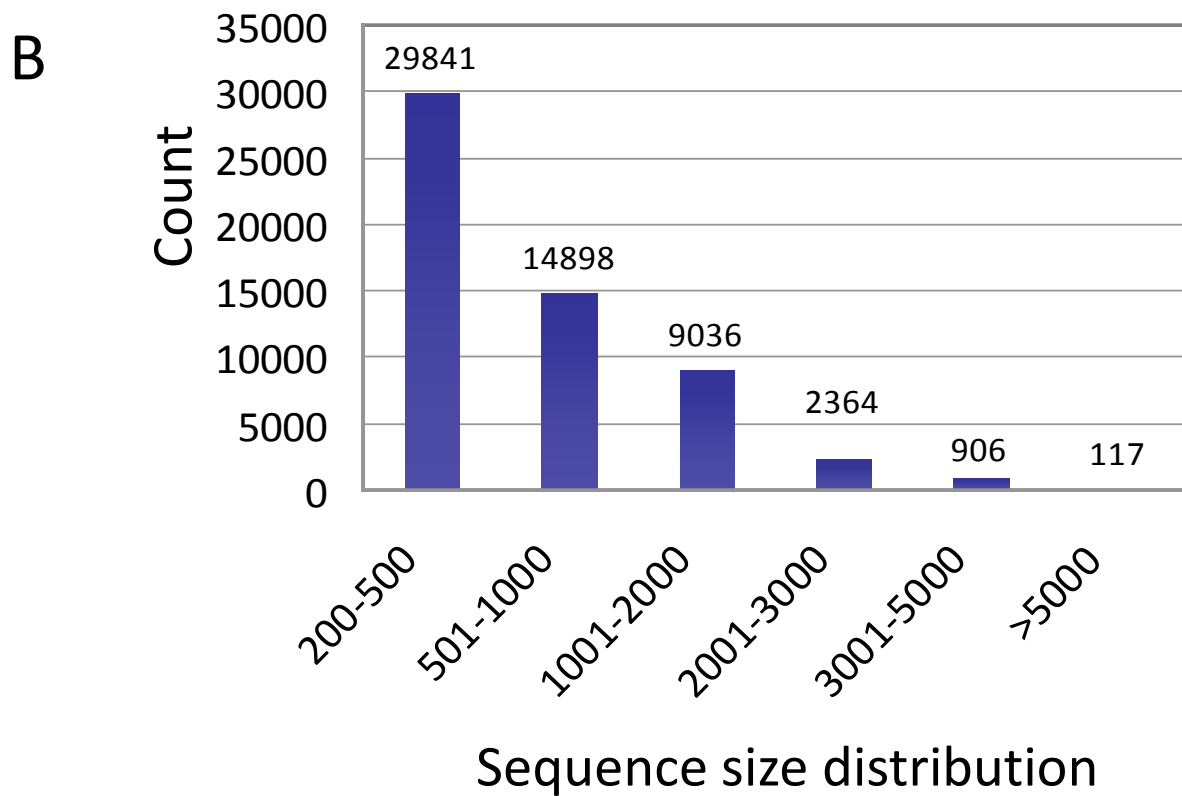

**Figure S1 Sequence size distribution. (A) Length distribution of sequences from Roche's 454 sequencing. (B) Length distribution of assembled contigs from Illumina/Solexa sequencing.**
