# Supplementary material for: Transcriptomic Analysis of Cadmium Stress Response in the Heavy Metal Hyperaccumulator Sedum alfredii Hance
Source: PubMed Central journal article supplement (PMC3670878; doi:10.1371/journal.pone.0064643), 2013-06-03
Supplement: pone.0064643.s002.pdf [file pone.0064643.s002.pdf]

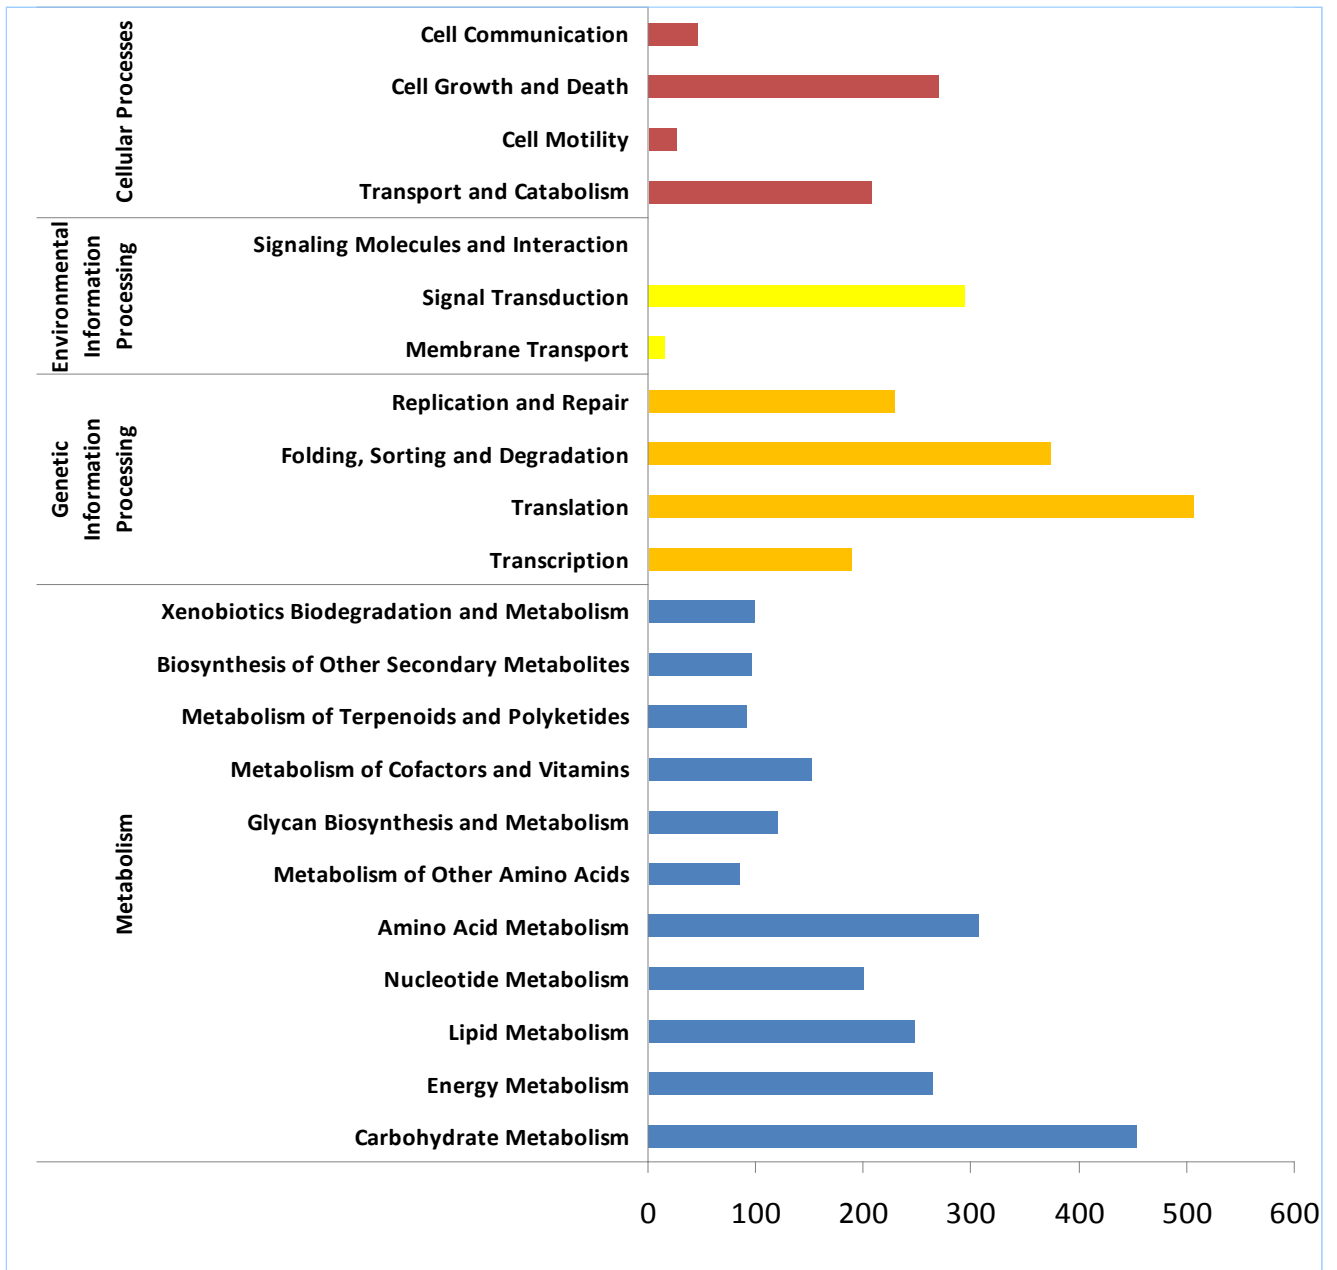

**Figure S2 Pathway analysis of *S. alfredii* Hance (HE) contigs.**
