# Supplementary material for: Transcriptomic Analysis of Cadmium Stress Response in the Heavy Metal Hyperaccumulator Sedum alfredii Hance
Source: PubMed Central journal article supplement (PMC3670878; doi:10.1371/journal.pone.0064643), 2013-06-03
Supplement: pone.0064643.s003.pdf [file pone.0064643.s003.pdf]

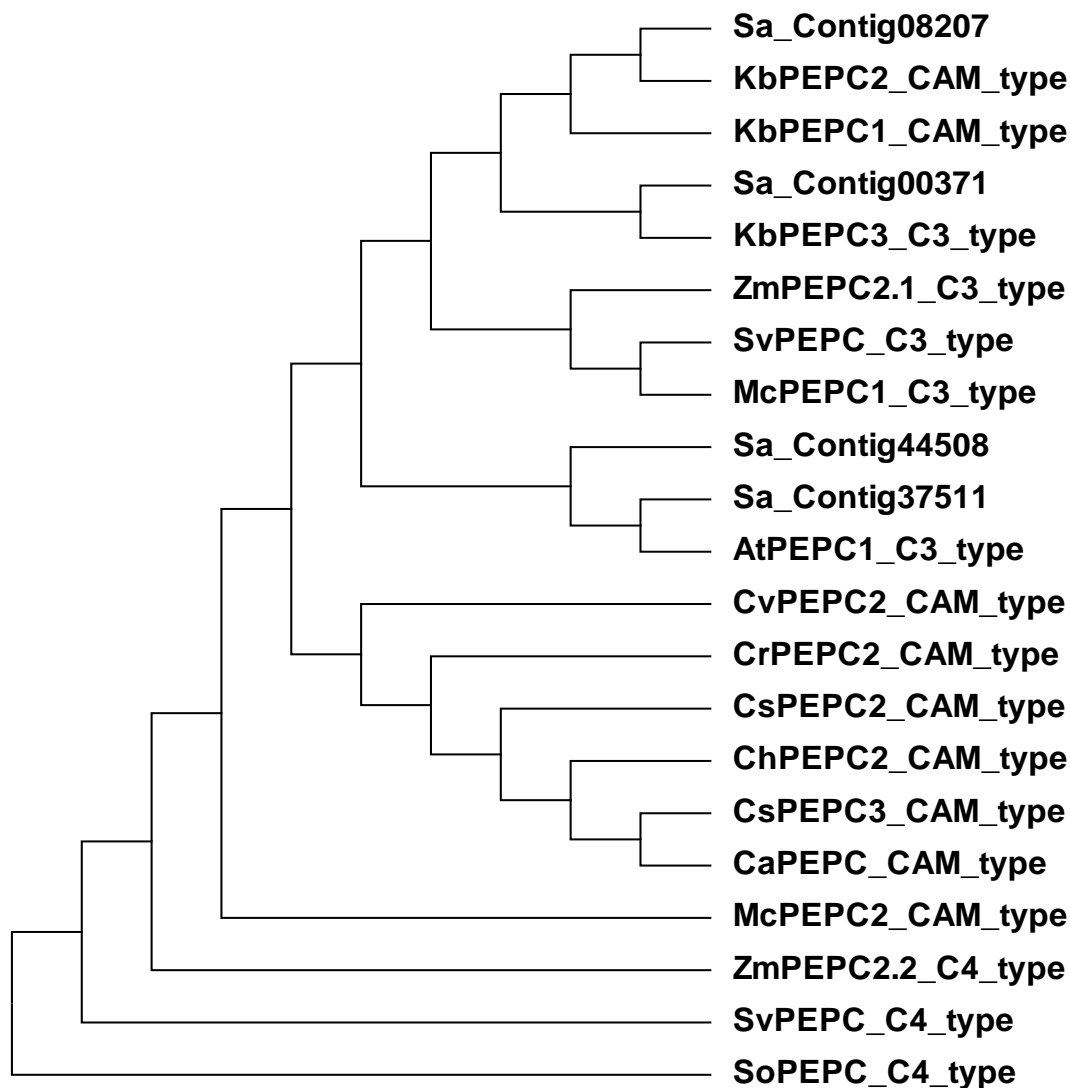

**Figure S3 Phylogenetic analysis of PEPC genes. Phylogenetic hypothesis was derived from maximum parsimony analysis of the C-terminal fragments of PEPCs from *S. alfredii* (Sa\_) and *Arabidopsis thaliana* (At\_), *Zea mays* (Zm\_), *Sorghum vulgare* (Sv\_), *Saccharum officinarum* (So\_), *Mesembryanthemum crystallinum* (Mc\_), *Kalanchoë blossfeldiana* (Kb\_), *Clusia venosa* (Cv\_), *Clusia rosea* (Cr\_), *Clusia schomburgkiana* (Cs\_), *Clusia hilariana* (Ch\_) and *Clusia aripoensis* (Ca\_). The tree was rooted with *Saccharum officinarum*. Accession numbers are listed in Table S5.**
